# Supplementary material
Source: PubMed Central journal article supplement (PMC6503561)
Supplement: jamainternmed-e188372-s001.pdf [file jamainternmed-e188372-s001.pdf]

## Supplementary Online Content

Lee JM, Arao RF, Sprague BL, et al. Performance of screening ultrasonography as an adjunct to screening mammography in women across the spectrum of breast cancer risk. *JAMA Intern Med.* Published online March 18, 2019. doi:10.1001/jamainternmed.2018.8372

**eAppendix.** Supplemental Appendix

**eFigure 1.** Distribution of Propensity Scores Before and After Propensity Score Matching for the Full Cohort of Women Receiving Mammography and Ultrasound Screening

**eFigure 2A.** Distribution of Propensity Scores Before and After Propensity Score Matching for Examinations Associated With Breast Cancer Diagnosis Within 1 Year

**eFigure 2B.** Distribution of Propensity Scores Plots Before and After Propensity Score Matching for Examinations With No Breast Cancer Diagnosis Within 1 Year

**eFigure 2C.** Distribution of Propensity Scores Before and After Propensity Score Matching for Examinations Associated With Biopsy Recommendations

**eTable.** Distribution of BI-RADS Breast Density by BCSC 5-Year Risk in 5392 Mammography Plus Ultrasound Examinations

This supplementary material has been provided by the authors to give readers additional information about their work.

## **eAppendix.** Supplemental Appendix

In our observational study, women who received mammography plus ultrasound screening were different from women who received mammography alone, based on comparison of characteristics summarized in Table 1. To provide a more “apples to apples” comparison of the two screening strategies, we selected examinations from the mammography alone cohort for matching with mammography plus ultrasound examinations, based on the probability of receiving screening ultrasound (propensity score-based matching) with a 5:1 ratio of mammography alone to mammography plus ultrasound examinations. We compared the distributions of characteristics (Table 1) and also compared kernel density plots of propensity score distributions both before and after matching.

Kernel density plots were used to present a visual summary of the distribution of the propensity scores, summed into an overall density plot. They present probability density rather than frequency, enabling comparison of the propensity score distributions in the two cohorts of differing size on the same y-axis scale. The x-axis scale uses the logit (log-odds) of the propensity score. As an example, an examination with a propensity score of 0.5, indicating a 50% probability of receiving mammography plus ultrasound screening would have a logit (p) value of 0.0. An examination with a propensity score of 0.1 would have a logit(p) value of -1. After matching, there is greater overlap of the areas under each curve.

# Overall

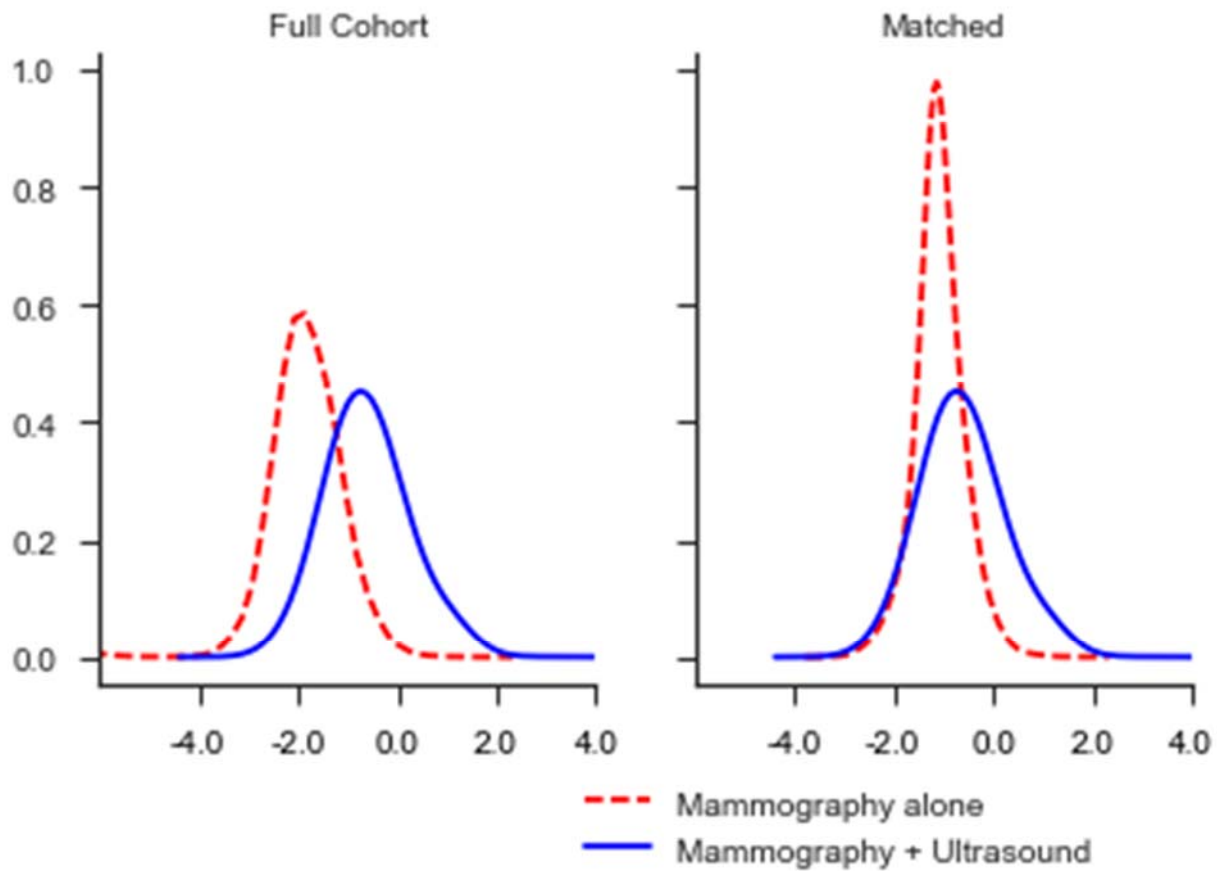

**eFigure 1.** Distribution of Propensity Scores Before and After Propensity Score Matching for the Full Cohort of Women Receiving Mammography and Ultrasound Screening. X-axis shows propensity score as the logit of the probability ( $p$ ) of receiving screening ultrasound. Y-axis shows the probability density.

## Sensitivity

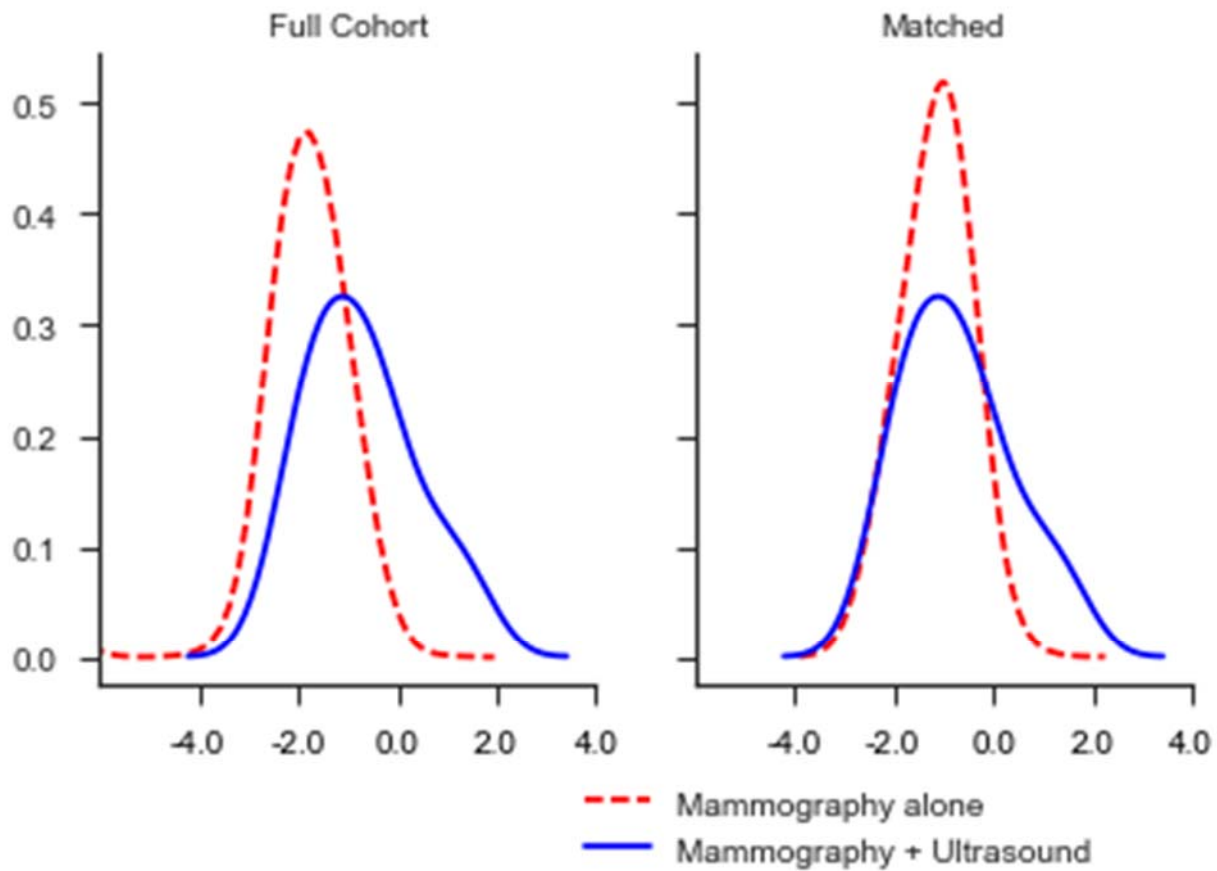

**eFigure 2A.** Distribution of Propensity Scores Before and After Propensity Score Matching for Examinations Associated With Breast Cancer Diagnosis Within 1 Year

## Specificity

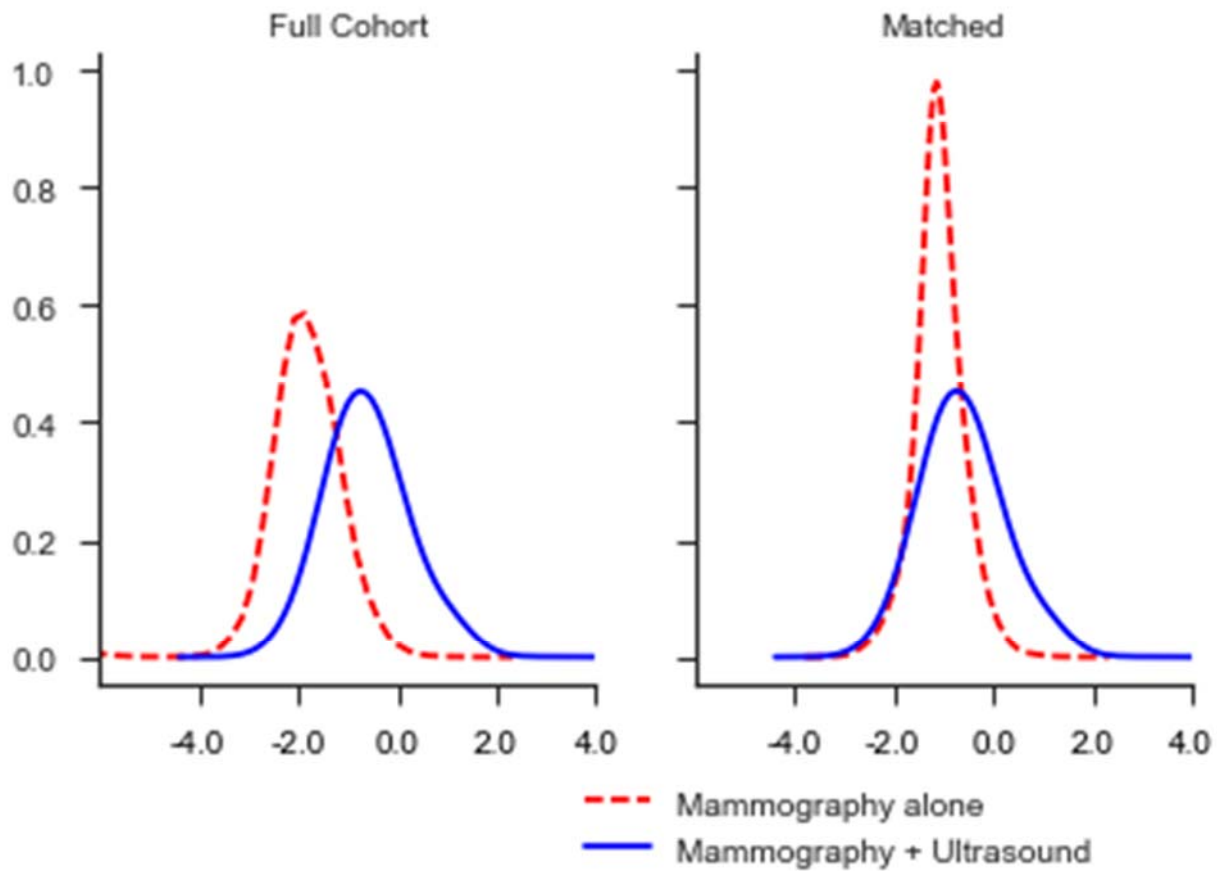

**eFigure 2B.** Distribution of Propensity Scores Plots Before and After Propensity Score Matching for Examinations With No Breast Cancer Diagnosis Within 1 Year

## PPV2

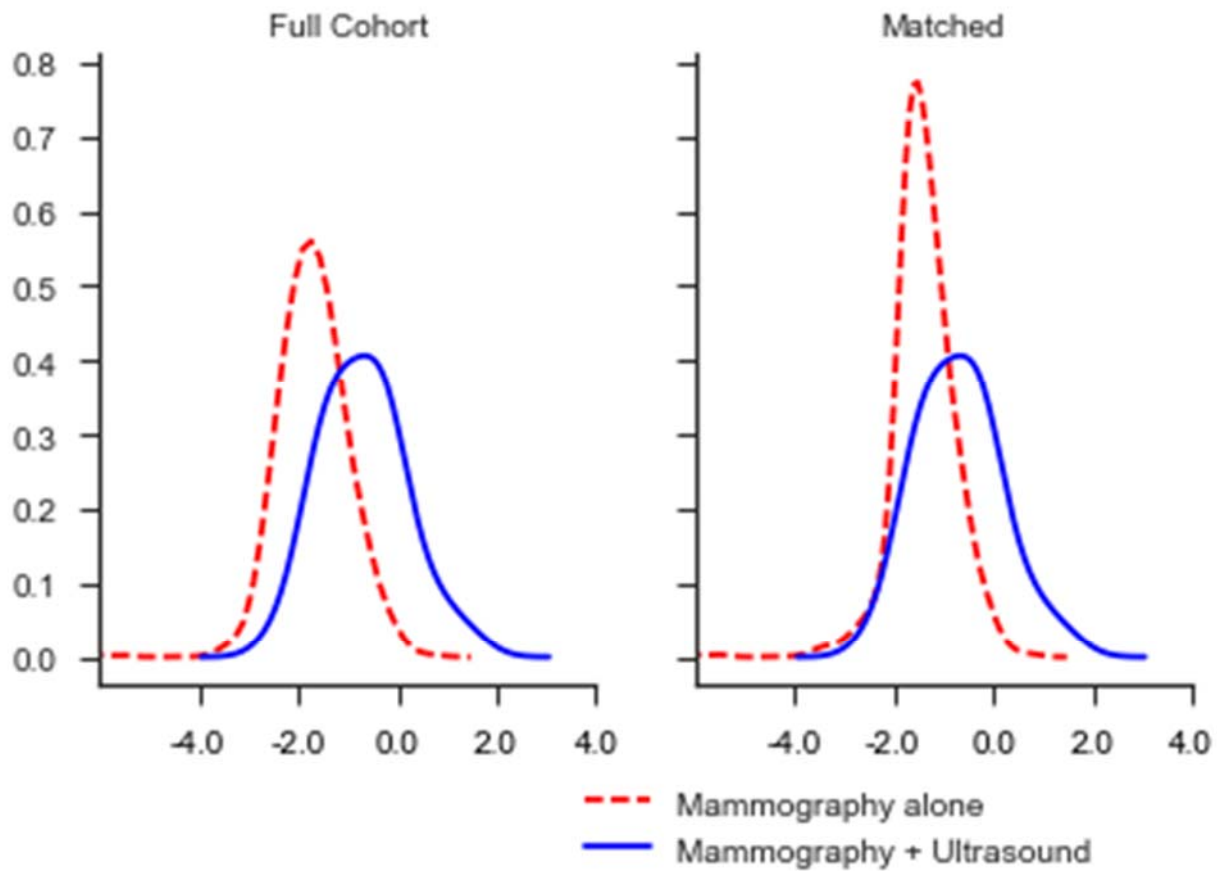

**eFigure 2C.** Distribution of Propensity Scores Before and After Propensity Score Matching for Examinations Associated With Biopsy Recommendations

**eTable.** Distribution of BI-RADS Breast Density by BCSC 5-Year Risk in 5392 Mammography Plus Ultrasound Examinations

| BCSC 5-yr risk                | BI-RADS Breast Density |      |      |     |      |
|-------------------------------|------------------------|------|------|-----|------|
|                               |                        |      |      |     |      |
| Low<br>(0%-1.00%)             | 51                     | 443  | 591  | 111 | 1196 |
| Average<br>(1.00-1.66%)       | 16                     | 443  | 1000 | 234 | 1693 |
| Intermediate<br>(1.67%-2.49%) | 5                      | 240  | 903  | 201 | 1349 |
| High<br>(2.50%-3.99%)         | 2                      | 134  | 677  | 163 | 976  |
| Very High<br>(≥3.99%)         | 0                      | 16   | 141  | 21  | 178  |
| Total                         | 74                     | 1276 | 3312 | 730 | 5392 |
